# Supplementary material for: Potential flood volume of Himalayan glacial lakes
Source: Copernicus journal article supplement (doi:10.5194/nhess-13-1827-2013), 2013-07-16
Supplement: Supplementary file 1 [file nhess-13-1827-2013-supplement.zip]

Table S1. Information of ASTER data used in this study. Granule ID denote a unique number for individual ASTER data. Longitude and latitude are of the image center. Lakes delineated and chosen are number of lakes delineated in individual image, and of lakes selected for the subsequent analysis.

| Granule ID                    | Acquisition date | Longitude | Latitude | Lakes delineated | Lakes chosen |
|-------------------------------|------------------|-----------|----------|------------------|--------------|
| ASTL1A0010100537270106220578  | 10-Oct-2000      | 82.080    | 30.346   | 109              | 49           |
| ASTL1A0010280525060107090597  | 28-Oct-2000      | 85.150    | 28.691   | 31               | 20           |
| ASTL1A0011010500260107130629  | 1-Nov-2000       | 88.953    | 27.932   | 111              | 90           |
| ASTL1A0011010500350107130630  | 1-Nov-2000       | 88.824    | 27.399   | 39               | 39           |
| ASTL1A0011090549040303210003  | 9-Nov-2000       | 79.536    | 30.816   | 32               | 15           |
| ASTL1A0011150512410107210279  | 15-Nov-2000      | 86.292    | 28.424   | 150              | 64           |
| ASTL1A0011240506260304060647  | 24-Nov-2000      | 87.363    | 27.938   | 42               | 23           |
| ASTL1A0012150524110108090592  | 15-Dec-2000      | 84.099    | 28.848   | 12               | 10           |
| ASTL1A0101200458520109050995  | 20-Jan-2001      | 90.164    | 28.312   | 42               | 29           |
| ASTL1A0102280504350312150720  | 28-Feb-2001      | 88.536    | 28.324   | 4                | 3            |
| ASTL1A0104240509320401260651  | 24-Apr-2001      | 86.973    | 28.327   | 21               | 15           |
| ASTL1A0109200523360110070380  | 20-Sep-2001      | 81.669    | 30.075   | 71               | 34           |
| ASTL1A0110110541060110240508  | 11-Oct-2001      | 78.267    | 32.108   | 7                | 4            |
| ASTL1A0110130529100110260960  | 13-Oct-2001      | 80.567    | 30.565   | 53               | 15           |
| ASTL1A0110180547090110290202  | 18-Oct-2001      | 78.185    | 31.892   | 4                | 2            |
| ASTL1A0110240510470111080504  | 24-Oct-2001      | 85.401    | 28.331   | 61               | 20           |
| ASTL1A0110290528170111110879  | 29-Oct-2001      | 81.388    | 30.448   | 47               | 29           |
| ASTL1A0110290528250111110880  | 29-Oct-2001      | 81.249    | 29.916   | 22               | 11           |
| ASTL1A0110310516020111120765  | 31-Oct-2001      | 83.148    | 29.533   | 18               | 8            |
| ASTL1A0110310516110111120766  | 31-Oct-2001      | 83.017    | 29.000   | 19               | 10           |
| ASTL1A0111110457430112140260  | 11-Nov-2001      | 87.726    | 27.888   | 125              | 81           |
| ASTL1A0111200451120111300272  | 20-Nov-2001      | 90.080    | 28.325   | 51               | 26           |
| ASTL1A0111200451210111300273  | 20-Nov-2001      | 89.945    | 27.792   | 41               | 26           |
| ASTL1A0111210533440112050016  | 21-Nov-2001      | 78.840    | 31.140   | 5                | 4            |
| ASTL1A0112050545390112190343  | 5-Dec-2001       | 78.060    | 31.358   | 4                | 4            |
| ASTL1A0112060450520112200330  | 6-Dec-2001       | 90.740    | 28.227   | 59               | 32           |
| ASTL1A0112070533200112220027  | 7-Dec-2001       | 78.808    | 31.145   | 5                | 2            |
| ASTL1A0112130456420112270108  | 13-Dec-2001      | 88.420    | 27.789   | 76               | 47           |
| ASTL1A0112240437230202210703  | 24-Dec-2001      | 94.192    | 29.278   | 60               | 57           |
| ASTL1A0112240437320202210704  | 24-Dec-2001      | 94.052    | 28.747   | 3                | 3            |
| ASTL1A0202010442550202181006  | 1-Feb-2002       | 91.735    | 28.860   | 7                | 6            |
| ASTL1A0202220500520203061537  | 22-Feb-2002      | 86.066    | 29.006   | 2                | 2            |
| ASTL1A0210030554310210250580  | 3-Oct-2002       | 75.830    | 33.992   | 14               | 6            |
| ASTL1A0210250518430211070774  | 25-Oct-2002      | 83.385    | 29.277   | 32               | 21           |
| ASTL1A0210250518520211070775  | 25-Oct-2002      | 83.244    | 28.745   | 13               | 11           |
| ASTL1A0210280548280211110724  | 28-Oct-2002      | 77.211    | 33.464   | 1                | 0            |
| ASTL1A0210280548370211110725  | 28-Oct-2002      | 77.058    | 32.934   | 6                | 5            |
| ASTL1A0210280548450211110726  | 28-Oct-2002      | 76.906    | 32.404   | 2                | 2            |
| ASTL1A0210310441570211140203  | 31-Oct-2002      | 90.959    | 28.419   | 15               | 5            |
| ASTL1A0212090448280212220388  | 9-Dec-2002       | 89.683    | 28.381   | 25               | 15           |
| ASTL1A0212090448370212220389  | 9-Dec-2002       | 89.550    | 27.849   | 39               | 25           |
| ASTL1A02122805184703011140466 | 28-Dec-2002      | 82.656    | 29.385   | 3                | 3            |
| ASTL1A0301200524400302060835  | 20-Jan-2003      | 80.911    | 29.965   | 11               | 6            |
| ASTL1A0301280435270303170324  | 28-Jan-2003      | 93.653    | 29.358   | 2                | 2            |
| ASTL1A0301280435360303170325  | 28-Jan-2003      | 93.515    | 28.826   | 1                | 1            |
| ASTL1A0302040441560302280957  | 4-Feb-2003       | 92.347    | 28.218   | 5                | 4            |
| ASTL1A0309260517080310070441  | 26-Sep-2003      | 83.125    | 29.868   | 20               | 11           |

Cont.

| Granule ID                   | Acquisition date | Longitude | Latitude | Lakes delineated | Lakes chosen |
|------------------------------|------------------|-----------|----------|------------------|--------------|
| ASTL1A0310010535200310120325 | 1-Oct-2003       | 78.649    | 31.501   | 20               | 15           |
| ASTL1A0310010535290310120326 | 1-Oct-2003       | 78.507    | 30.970   | 13               | 8            |
| ASTL1A0310080541190310210182 | 8-Oct-2003       | 77.752    | 32.510   | 6                | 1            |
| ASTL1A0310080541280310210183 | 8-Oct-2003       | 77.605    | 31.980   | 16               | 14           |
| ASTL1A0310100529250310220539 | 10-Oct-2003      | 79.307    | 31.076   | 44               | 33           |
| ASTL1A0310100529340310220540 | 10-Oct-2003      | 79.171    | 30.544   | 10               | 10           |
| ASTL1A0310180440470310300358 | 18-Oct-2003      | 91.700    | 28.314   | 16               | 13           |
| ASTL1A0310300505290311130572 | 30-Oct-2003      | 85.540    | 28.311   | 79               | 37           |
| ASTL1A0310310547060311140750 | 31-Oct-2003      | 76.291    | 34.155   | 3                | 2            |
| ASTL1A0310310547150311140751 | 31-Oct-2003      | 76.143    | 33.625   | 6                | 3            |
| ASTL1A0311020535320311160280 | 2-Nov-2003       | 78.276    | 31.555   | 4                | 2            |
| ASTL1A0311120435040311240932 | 12-Nov-2003      | 92.090    | 28.477   | 4                | 0            |
| ASTL1A0311220512300312020311 | 22-Nov-2003      | 84.890    | 28.177   | 3                | 0            |
| ASTL1A0403020530120403190260 | 2-Mar-2004       | 79.826    | 30.450   | 4                | 2            |
| ASTL1A0403180529480404040366 | 18-Mar-2004      | 80.010    | 30.976   | 2                | 0            |
| ASTL1A0403180529570404040367 | 18-Mar-2004      | 79.870    | 30.444   | 4                | 3            |
| ASTL1A0409080540470409190506 | 8-Sep-2004       | 77.301    | 32.576   | 32               | 17           |
| ASTL1A0409170534350409280459 | 17-Sep-2004      | 77.709    | 32.736   | 18               | 7            |
| ASTL1A0410160504350410280200 | 16-Oct-2004      | 85.425    | 28.327   | 48               | 22           |
| ASTL1A0410250458150411040497 | 25-Oct-2004      | 86.627    | 28.376   | 61               | 28           |
| ASTL1A0410280528220411070153 | 28-Oct-2004      | 79.964    | 30.982   | 11               | 5            |
| ASTL1A0411020545540411110369 | 2-Nov-2004       | 75.596    | 34.806   | 13               | 12           |
| ASTL1A0411020546020411110370 | 2-Nov-2004       | 75.451    | 34.274   | 15               | 6            |
| ASTL1A0412030504190412140490 | 3-Dec-2004       | 84.837    | 28.411   | 2                | 1            |
| ASTL1A0412260510530501090794 | 26-Dec-2004      | 84.670    | 28.210   | 1                | 0            |
| ASTL1A0412280458410501110212 | 28-Dec-2004      | 85.841    | 27.935   | 6                | 5            |
| ASTL1A0508280528420508310149 | 28-Aug-2005      | 79.846    | 31.000   | 31               | 7            |
| ASTL1A0508300516280509020157 | 30-Aug-2005      | 82.254    | 30.545   | 28               | 11           |
| ASTL1A0508300516370509020158 | 30-Aug-2005      | 82.118    | 30.013   | 56               | 38           |
| ASTL1A0508300516460509020159 | 30-Aug-2005      | 81.984    | 29.480   | 2                | 1            |
| ASTL1A0509260458220509280522 | 26-Sep-2005      | 85.992    | 28.465   | 65               | 31           |
| ASTL1A0510290540340511070136 | 29-Oct-2005      | 77.287    | 32.579   | 11               | 5            |
| ASTL1A0510290540430511070137 | 29-Oct-2005      | 77.143    | 32.047   | 14               | 11           |
| ASTL1A0511040504420511070290 | 4-Nov-2005       | 84.704    | 28.430   | 3                | 1            |
| ASTL1A0511070534260511100072 | 7-Nov-2005       | 77.677    | 32.740   | 7                | 5            |
| ASTL1A0511130458410511190111 | 13-Nov-2005      | 86.806    | 27.799   | 114              | 53           |
| ASTL1A0512010446080512030561 | 1-Dec-2005       | 91.071    | 28.177   | 31               | 23           |
| ASTL1A0512060504480512090573 | 6-Dec-2005       | 86.290    | 27.647   | 22               | 8            |
| ASTL1A0512080452250512110289 | 8-Dec-2005       | 89.388    | 27.646   | 28               | 22           |
| ASTL1A0602120439480602140585 | 12-Feb-2006      | 90.917    | 27.874   | 18               | 10           |
| ASTL1A0609250522560609280451 | 25-Sep-2006      | 81.111    | 30.488   | 13               | 7            |
| ASTL1A0610040516390610070151 | 4-Oct-2006       | 81.943    | 30.588   | 45               | 14           |
| ASTL1A0610070546280610100197 | 7-Oct-2006       | 76.709    | 34.094   | 5                | 4            |
| ASTL1A0610070546370610100198 | 7-Oct-2006       | 76.559    | 33.563   | 19               | 13           |
| ASTL1A0610070546460610100199 | 7-Oct-2006       | 76.410    | 33.033   | 26               | 14           |
| ASTL1A0610110522440610140050 | 11-Oct-2006      | 80.417    | 30.585   | 63               | 23           |
| ASTL1A0611010540540611040102 | 1-Nov-2006       | 78.377    | 31.862   | 3                | 2            |
| ASTL1A0612060433520612090228 | 6-Dec-2006       | 93.083    | 28.889   | 1                | 1            |
| ASTL1A0612060434000612090229 | 6-Dec-2006       | 92.949    | 28.356   | 16               | 14           |
| ASTL1A0612060434090612090230 | 6-Dec-2006       | 92.815    | 27.824   | 2                | 0            |
| ASTL1A0612200446470612250006 | 20-Dec-2006      | 89.863    | 27.804   | 27               | 22           |

Cont.

| Granule ID                   | Acquisition date | Longitude | Latitude | Lakes delineated | Lakes chosen |
|------------------------------|------------------|-----------|----------|------------------|--------------|
| ASTL1A0701190459340701220148 | 19-Jan-2007      | 86.541    | 27.837   | 77               | 20           |
| ASTL1A0711010511160805220766 | 1-Nov-2007       | 84.838    | 28.738   | 16               | 7            |
| ASTL1A0711140440360806080161 | 14-Nov-2007      | 91.608    | 27.775   | 41               | 34           |
| ASTL1A0711170511150711200123 | 17-Nov-2007      | 85.227    | 28.679   | 17               | 6            |
| ASTL1A0711170511230806110845 | 17-Nov-2007      | 85.085    | 28.147   | 2                | 1            |
| ASTL1A0711190459120806130457 | 19-Nov-2007      | 88.023    | 27.618   | 57               | 30           |
| ASTL1A0711220529250806160344 | 22-Nov-2007      | 78.822    | 30.592   | 3                | 3            |
| ASTL1A0711230434320806170414 | 23-Nov-2007      | 92.069    | 27.929   | 15               | 9            |
| ASTL1A0711240517220806180334 | 24-Nov-2007      | 81.642    | 29.528   | 5                | 4            |
| ASTL1A0711250421450806190206 | 25-Nov-2007      | 95.546    | 29.528   | 12               | 9            |
| ASTL1A0711270546590806240134 | 27-Nov-2007      | 75.140    | 34.317   | 28               | 19           |
| ASTL1A0712160440570807210302 | 16-Dec-2007      | 91.203    | 27.834   | 15               | 12           |
| ASTL1A0712180428090807230328 | 18-Dec-2007      | 95.051    | 29.380   | 5                | 5            |
| ASTL1A0712210459220807270456 | 21-Dec-2007      | 87.411    | 28.263   | 55               | 32           |
| ASTL1A0712210459310807270457 | 21-Dec-2007      | 87.274    | 27.731   | 4                | 1            |
| ASTL1A0712250434490807300315 | 25-Dec-2007      | 92.386    | 27.885   | 51               | 45           |
| ASTL1A0712260517390808010700 | 26-Dec-2007      | 83.772    | 29.218   | 49               | 41           |
| ASTL1A0712260517480808010701 | 26-Dec-2007      | 83.629    | 28.687   | 3                | 1            |
| ASTL1A0712300453230808040198 | 30-Dec-2007      | 88.104    | 27.835   | 102              | 52           |
| ASTL1A0801010440530808080518 | 1-Jan-2008       | 90.608    | 28.468   | 19               | 12           |
| ASTL1A0801010441020808080519 | 1-Jan-2008       | 90.478    | 27.935   | 230              | 163          |
| ASTL1A0801040511390808100699 | 4-Jan-2008       | 84.452    | 28.796   | 5                | 4            |
| ASTL1A0801040511480808100700 | 4-Jan-2008       | 84.314    | 28.264   | 3                | 2            |
| ASTL1A0801060459270808120304 | 6-Jan-2008       | 87.049    | 28.316   | 18               | 5            |
| ASTL1A0801060459360808120305 | 6-Jan-2008       | 86.914    | 27.784   | 94               | 43           |
| ASTL1A0801130505390808190795 | 13-Jan-2008      | 86.213    | 28.211   | 78               | 43           |
| ASTL1A0802070459270903010607 | 7-Feb-2008       | 86.705    | 28.365   | 34               | 13           |
| ASTL1A0802070459350802110337 | 7-Feb-2008       | 86.572    | 27.833   | 57               | 22           |
| ASTL1A0802230459310903220613 | 23-Feb-2008      | 86.586    | 27.831   | 46               | 15           |
| ASTL1A0802250446510903250589 | 25-Feb-2008      | 90.301    | 28.844   | 6                | 6            |
| ASTL1A0802280517350803020053 | 25-Feb-2008      | 82.369    | 29.426   | 2                | 0            |
| ASTL1A0803010505210803040131 | 1-Mar-2008       | 85.326    | 28.893   | 15               | 10           |
| ASTL1A0810120547270810140884 | 12-Oct-2008      | 75.857    | 34.218   | 21               | 14           |
| ASTL1A0810120547360810140885 | 12-Oct-2008      | 75.712    | 33.687   | 19               | 11           |
| ASTL1A0811040553280811070628 | 4-Nov-2008       | 75.907    | 33.980   | 5                | 1            |
| ASTL1A0812060554020812090093 | 6-Dec-2008       | 75.702    | 33.458   | 6                | 3            |
| ASTL1A0901200524300901230115 | 20-Jan-2009      | 82.350    | 29.752   | 42               | 26           |
| ASTL1A0909260517310909290150 | 26-Sep-2009      | 82.832    | 29.911   | 135              | 44           |
| ASTL1A0910310547260911030057 | 31-Oct-2009      | 76.854    | 33.519   | 2                | 2            |
| ASTL1A0910310547350911030058 | 31-Oct-2009      | 76.703    | 32.989   | 6                | 3            |
| ASTL1A1011030547141011100111 | 3-Nov-2010       | 76.559    | 32.458   | 4                | 4            |
| ASTL1A1011100553021011140326 | 10-Nov-2010      | 75.081    | 34.106   | 20               | 16           |
| Total                        | 140 scenes       |           |          | 4037             | 2276         |
